# Supplementary material for: Unlocking the diagnostic power of plasma extracellular vesicle miR-200 family in pancreatic ductal adenocarcinoma
Source: PubMed Central journal article supplement (PMC11229220; doi:10.1186/s13046-024-03090-z), 2024-07-08
Supplement: 13046_2024_3090_MOESM2_ESM.pdf [file 13046_2024_3090_MOESM2_ESM.pdf]

# MIBlood-EV

## Standardized Reporting Tool for Blood EV Research (Human)

### STUDY INFORMATION

|                                                |          |         |                       |                                 |        |
|------------------------------------------------|----------|---------|-----------------------|---------------------------------|--------|
| 1.0 Manuscript title                           |          |         |                       |                                 |        |
| 1.1 Corresponding author (Name and Email)      |          |         |                       |                                 |        |
| 1.2 Institution name                           |          |         |                       |                                 |        |
| 1.3 Time period of experiment (e.g. 2022-2024) |          |         |                       | 1.4 Number of samples           |        |
| 1.5 Cargo of interest                          | Vesicles | Protein | RNA                   | DNA                             | Other: |
| 1.6 Biospecimen type                           | Plasma   | Serum   | 1.7 Biospecimen state |                                 |        |
| 1.8 Source of frozen specimens                 |          |         |                       | 1.9 Years of collection (range) |        |

### BLOOD COLLECTION AND PROCESSING

|                                                                       |      |                                      |                                                     |        |  |
|-----------------------------------------------------------------------|------|--------------------------------------|-----------------------------------------------------|--------|--|
| 2.0 Patient fasting status                                            |      | 2.1 Fasting length (e.g. hours/days) |                                                     |        |  |
| 2.2 Anatomical access site                                            |      |                                      | 2.3 Needle diameter (e.g. gauge)                    |        |  |
| 2.4 Blood volume collected (mL)                                       |      |                                      |                                                     |        |  |
| 2.5 Plasma anticoagulant                                              | EDTA | Citrate                              | Heparin                                             | Other: |  |
| 2.6 Serum tube type                                                   |      |                                      | 2.7 Serum clotting time (minutes)                   |        |  |
| 2.8 Time between collection and first centrifugation (range in hours) |      |                                      |                                                     |        |  |
| 2.9 Transport temperature                                             |      |                                      | 2.10 Transport condition of tubes                   |        |  |
| 2.11 Centrifuge brand and model                                       |      |                                      |                                                     |        |  |
| 2.12 Bucket rotor type                                                |      |                                      | 2.13 Number of centrifugation cycles                |        |  |
| 2.14a 1 <sup>st</sup> Centrifugation speed (RCF in x g)               |      |                                      | 2.14b 1 <sup>st</sup> Centrifugation time (minutes) |        |  |
| 2.15 1 <sup>st</sup> Rotor brake                                      |      |                                      | 2.16 1 <sup>st</sup> Centrifugation temperature     |        |  |
| 2.17a 2 <sup>nd</sup> Centrifugation speed (RCF in x g)               |      |                                      | 2.17b 2 <sup>nd</sup> Centrifugation time (minutes) |        |  |
| 2.18 2 <sup>nd</sup> Rotor brake                                      |      |                                      | 2.19 2 <sup>nd</sup> Centrifugation temperature     |        |  |
| 2.20 Additional processing steps (e.g. filtration)                    |      |                                      |                                                     |        |  |
| 2.21 Storage tubes (brand, type, source, catalog number)              |      |                                      |                                                     |        |  |
| 2.22 Storage temperature                                              |      |                                      | 2.23 Length of storage (range in years)             |        |  |

### PLASMA/SERUM QUALITY CONTROL

|                                          |  |                                |  |
|------------------------------------------|--|--------------------------------|--|
| 3.0 Number of freeze-thaw cycles (range) |  |                                |  |
| 3.1 Thawing temperature                  |  | 3.2 Thawing duration (minutes) |  |

### Hemolysis

|                                                                          |  |                                                        |                                   |
|--------------------------------------------------------------------------|--|--------------------------------------------------------|-----------------------------------|
| 3.3 Presence of hemolysis                                                |  | 3.4 Frequency of hemolyzed samples (e.g. <25%, 25-50%) |                                   |
| 3.5 Method used                                                          |  |                                                        | 3.6 RBC count (Median, 95% CI, N) |
| 3.7 RBC counter brand and type                                           |  |                                                        |                                   |
| 3.8 Spectrophotometry hemoglobin concentration (mean g/L)                |  |                                                        |                                   |
| 3.9 Spectrophotometer brand, model and wavelength measured (e.g. 414 nm) |  |                                                        |                                   |
| 3.10 Hemolyzed samples were discarded                                    |  |                                                        |                                   |

## Platelets

|                                                                                                    |  |                                        |  |
|----------------------------------------------------------------------------------------------------|--|----------------------------------------|--|
| 3.11 Presence of platelets                                                                         |  | 3.12 Method used (e.g. Flow Cytometry) |  |
| 3.13 Marker(s) used (e.g. CD61, CD41)                                                              |  |                                        |  |
| 3.14 Concentration (median, 95% CI, N)                                                             |  |                                        |  |
| 3.15 Platelet counter instrument brand, type and limit of detection (cells/L)                      |  |                                        |  |
| 3.16 Flow cytometer brand and type                                                                 |  |                                        |  |
| 3.17 Flow cytometry size and fluorescence ranges of detection in nanometers and MESF, respectively |  |                                        |  |

## Lipoproteins

|                                                                                                    |  |                                  |  |
|----------------------------------------------------------------------------------------------------|--|----------------------------------|--|
| 3.18 Presence of lipoproteins                                                                      |  | 3.19 Method used (WB, ELISA, FC) |  |
| 3.20 Spectrophotometry L-index                                                                     |  |                                  |  |
| 3.21 Spectrophotometer brand, model and wavelength measured (e.g. 700 nm)                          |  |                                  |  |
| 3.22 WB Marker(s) used (e.g. Apo B)                                                                |  |                                  |  |
| 3.23 Western blot images provided in manuscript?                                                   |  |                                  |  |
| 3.24 Flow cytometry marker(s) used (e.g. ApoB)                                                     |  |                                  |  |
| 3.25 Flow cytometry concentration (median, 95% CI, N)                                              |  |                                  |  |
| 3.26 Flow cytometer brand and type                                                                 |  |                                  |  |
| 3.27 Flow cytometry size and fluorescence ranges of detection in nanometers and MESF, respectively |  |                                  |  |
| 3.28 Brand and catalog number for ELISA kit used for each Apolipoprotein test (e.g. ApoB)          |  |                                  |  |
| 3.29 Concentration measured for each Apolipoprotein tested (mean µg/mL)                            |  |                                  |  |
